# Supplementary material for: Pulmonary Nontuberculous Mycobacteria, Ontario, Canada, 2020
Source: PubMed Central journal article supplement (PMC10310396; doi:10.3201/eid2907.230216), 2023-07
Supplement: 23-0216-Techapp-s1.pdf [file 23-0216-Techapp-s1.pdf]

*EID cannot ensure accessibility for supplementary materials supplied by authors.*

*Readers who have difficulty accessing supplementary content should contact the authors for assistance.*

# Pulmonary Nontuberculous Mycobacteria, Ontario, Canada, 2020

## Appendix

**Appendix Table 1.** Number and percent of nontuberculous mycobacterial species by age group of patients in the microbiological standard and strict disease state, Ontario, 2020\*

| NTM Species                             | Standard definition age groups (years) †‡ |            |             |             |             |             |
|-----------------------------------------|-------------------------------------------|------------|-------------|-------------|-------------|-------------|
|                                         | 0-19                                      | 20-39      | 40-59       | 60-69       | 70-79       | 80+         |
| <i>M. avium</i> (n=1,954)               | 15 (0.8%)                                 | 153 (7.8%) | 321 (16.4%) | 508 (26.0%) | 555 (28.4%) | 401 (20.5%) |
| <i>M. intracellulare</i> (n=182)        | 1 (0.5%)                                  | 7 (3.8%)   | 20 (11.0%)  | 37 (20.3%)  | 66 (36.3%)  | 51 (28.0%)  |
| <i>M. chimaera</i> (n=39)               | 1 (2.6%)                                  | 2 (5.1%)   | 10 (25.6%)  | 11 (28.2%)  | 8 (20.5%)   | 7 (17.9%)   |
| <i>M. abscessus</i> (n=164)             | 12 (7.3%)                                 | 31 (18.9%) | 18 (11.0%)  | 32 (19.5%)  | 51 (31.1%)  | 20 (12.2%)  |
| <i>M. xenopi</i> (n=123)                | 0 (0.0%)                                  | 6 (4.9%)   | 18 (14.6%)  | 42 (34.1%)  | 39 (31.7%)  | 18 (14.6%)  |
| <i>M. fortuitum</i> (n=98)              | 0 (0.0%)                                  | 3 (3.1%)   | 23 (23.5%)  | 26 (26.5%)  | 27 (27.6%)  | 19 (19.4%)  |
| <i>M. goodnae</i> (n=117)               | 1 (0.9%)                                  | 12 (10.3%) | 24 (20.5%)  | 26 (22.2%)  | 28 (23.9%)  | 26 (22.2%)  |
| Other NTM (n=147)                       | 1 (0.7%)                                  | 24 (16.3%) | 25 (17.0%)  | 43 (29.3%)  | 31 (21.1%)  | 23 (15.6%)  |
| Total (n=2,824)                         | 31 (1.1%)                                 | 238 (8.4%) | 459 (16.3%) | 725 (25.7%) | 805 (28.5%) | 565 (20.0%) |
| Total age standardized prevalence ratio | 0.05                                      | 0.30       | 0.61        | 2.14        | 3.69        | 4.46        |
|                                         | Strict definition age groups (years) §‡   |            |             |             |             |             |
|                                         | 0-19                                      | 20-39      | 40-59       | 60-69       | 70-79       | 80+         |
| <i>M. avium</i> (n=1,171)               | 13 (1.1%)                                 | 74 (6.3%)  | 172 (14.7%) | 303 (25.9%) | 351 (30.0%) | 257 (21.9%) |
| <i>M. intracellulare</i> (n=101)        | 1 (1.0%)                                  | 3 (3.0%)   | 11 (10.9%)  | 23 (22.8%)  | 40 (39.6%)  | 23 (22.2%)  |
| <i>M. chimaera</i> (n=18)               | 0 (0%)                                    | 1 (5.6%)   | 5 (27.8%)   | 3 (16.7%)   | 6 (33.3%)   | 3 (16.7%)   |
| <i>M. abscessus</i> (n=114)             | 8 (7.0%)                                  | 24 (21.1%) | 13 (11.4%)  | 23 (20.2%)  | 35 (30.7%)  | 11 (9.6%)   |
| <i>M. xenopi</i> (n=63)                 | 0 (0.0%)                                  | 2 (3.2%)   | 9 (14.3%)   | 23 (36.5%)  | 18 (28.6%)  | 11 (17.5%)  |
| <i>M. fortuitum</i> (n=53)              | 0 (0.0%)                                  | 1 (1.9%)   | 10 (18.9%)  | 16 (30.2%)  | 18 (34.0%)  | 8 (15.1%)   |
| <i>M. goodnae</i> (n=26)                | 0 (0.0%)                                  | 3 (11.5%)  | 1 (3.8%)    | 7 (26.9%)   | 6 (23.1%)   | 9 (34.6%)   |
| Other NTM (n=56)                        | 1 (1.8%)                                  | 6 (10.7%)  | 11 (19.6%)  | 22 (39.3%)  | 11 (19.6%)  | 5 (8.9%)    |
| Total                                   | 23 (1.4%)                                 | 114 (7.1%) | 232 (14.5%) | 420 (26.2%) | 485 (30.3%) | 327 (20.4%) |
| Total age standardized prevalence ratio | 0.07                                      | 0.25       | 0.55        | 2.19        | 3.93        | 4.56        |

\*Counts within each disease definition represent unique patients; some patients fulfilled criteria for >1 species.

†Standard microbiological criteria: ≥2 sputum cultures with the same species, or 1 bronchoscopic or lung biopsy culture

‡Age unknown for 1 (<0.1%) person each with standard and strict microbiological disease respectively

§Strict microbiological criteria (subset of standard): ≥3 sputum cultures with the same species, or ≥2 bronchoscopic cultures with the same species, or 1 bronchoscopic plus 1 sputum culture with the same species, or 1 lung biopsy culture.

**Appendix Table 2.** Prevalence per 100,000 population and number of cases of nontuberculous mycobacterial pulmonary disease per standard definition\* by species and health region in Ontario, 2020

| Health Region | <i>M. avium</i> | <i>M. intracellulare</i> | <i>M. abscessus</i> | Other Species | All Species  |
|---------------|-----------------|--------------------------|---------------------|---------------|--------------|
| North West    | 2.5 (6)         | 0.4 (1)                  | 0.4 (1)             | 0.4 (1)       | 3.8 (9)      |
| North East    | 5.0 (28)        | 1.6 (9)                  | 0.5 (3)             | 1.3 (7)       | 8.4 (47)     |
| Eastern       | 2.6 (51)        | 0.6 (12)                 | 0.5 (10)            | 2.1 (41)      | 5.9 (114)    |
| Central East  | 10.8 (486)      | 1.0 (47)                 | 1.5 (66)            | 3.6 (163)     | 17.0 (762)   |
| Toronto       | 38.3 (1,195)    | 2.0 (62)                 | 1.9 (60)            | 7.6 (237)     | 49.8 (1,554) |
| Central West  | 5.3 (151)       | 1.1 (32)                 | 0.7 (20)            | 1.6 (45)      | 8.7 (248)    |
| South West    | 2.2 (37)        | 1.1 (19)                 | 0.2 (4)             | 1.8 (30)      | 5.3 (90)     |
| Total Ontario | 13.1 (1,954)    | 1.2 (182)                | 1.1 (164)           | 3.5 (524)     | 19.0 (2,824) |

\*Standard microbiological criteria:  $\geq 2$  sputum cultures with the same species, or 1 bronchoscopic or lung biopsy culture.

**Appendix Table 3.** Number, percent and prevalence per 100,000 of pulmonary nontuberculous mycobacterial disease, by non-overlapping microbiological definitions, Ontario, 2020\*

| NTM species/subspecies                 | Exclusively standard definition† | Strict definition‡   |
|----------------------------------------|----------------------------------|----------------------|
| Common MAC species                     |                                  |                      |
| <i>M. avium</i>                        | 783 (58.6%) / 5.32               | 1,171 (73.1%) / 7.95 |
| <i>M. intracellulare</i>               | 81 (6.1%) / 0.55                 | 101 (6.3%) / 0.69    |
| <i>M. chimaera</i>                     | 21 (1.6%) / 0.14                 | 18 (1.1%) / 0.12     |
| <i>M. abscessus</i> and its subspecies |                                  |                      |
| <i>M. abscessus</i> (total)            | 50 (8.5%) / 0.77                 | 114 (7.1%) / 0.77    |
| subspecies <i>abscessus</i>            | 29 (2.2%) / 0.20                 | 66 (4.1%) / 0.45     |
| subspecies <i>bolletii</i>             | 0 (0%) / 0                       | 1 (0.06%) / 0.01     |
| subspecies <i>massiliense</i>          | 14 (1.1%) / 0.10                 | 38 (2.4%) / 0.26     |
| subspecies unassigned                  | 7 (0.5%) / 0.05                  | 9 (0.6%) / 0.06      |
| Other species                          |                                  |                      |
| <i>M. xenopi</i>                       | 60 (4.5%) / 0.41                 | 63 (3.9%) / 0.43     |
| <i>M. fortuitum</i>                    | 45 (3.4%) / 0.31                 | 53 (3.3%) / 0.36     |
| <i>M. gordonae</i>                     | 91 (6.8%) / 0.62                 | 26 (1.6%) / 0.18     |
| Other NTM species                      | 91 (6.8%) / 0.62                 | 56 (3.5%) / 0.38     |
| Total                                  | 1,336 (100%) / 9.07              | 1,602 (100%) / 10.9  |

\*Counts within each disease definition represent unique patients; some patients fulfilled criteria for >1 species.

†Exclusively standard microbiological criteria: 2 sputum cultures with the same species, or 1 bronchoscopic or lung biopsy culture

‡Strict microbiological criteria:  $\geq 3$  sputum cultures with the same species, or  $\geq 2$  bronchoscopic cultures with the same species, or 1 bronchoscopic plus 1 sputum culture with the same species, or 1 lung biopsy culture.

**Appendix Table 4.** Number of patients with pulmonary nontuberculous mycobacteria by non-overlapping microbiological definitions, *Mycobacterium* species and sex, Ontario, 2020\*

| NTM Species              | Exclusively standard definition† |             |           | Strict definition‡ |             |           |
|--------------------------|----------------------------------|-------------|-----------|--------------------|-------------|-----------|
|                          | Female                           | Male        | Unknown   | Female             | Male        | Unknown   |
| <i>M. avium</i>          | 398 (50.8%)                      | 375 (47.9%) | 10 (1.3%) | 653 (55.8%)        | 506 (43.2%) | 12 (1.0%) |
| <i>M. intracellulare</i> | 43 (53.1%)                       | 37 (45.7%)  | 1 (1.2%)  | 71 (70.3%)         | 28 (27.7%)  | 2 (2.0%)  |
| <i>M. chimaera</i>       | 7 (33.3%)                        | 14 (66.7%)  | 0         | 10 (55.6)          | 8 (44.4%)   | 0         |
| <i>M. abscessus</i>      | 34 (68.0%)                       | 16 (32.0%)  | 0         | 68 (59.6%)         | 46 (40.4%)  | 0         |
| <i>M. xenopi</i>         | 34 (56.7%)                       | 23 (38.3%)  | 3 (5.0%)  | 29 (46.0%)         | 34 (54.0)   | 0         |
| <i>M. fortuitum</i>      | 21 (46.7%)                       | 23 (51.1%)  | 1 (2.2%)  | 26 (49.1%)         | 27 (50.9%)  | 0         |
| <i>M. gordonae</i>       | 36 (39.6%)                       | 54 (59.3%)  | 1 (1.1%)  | 10 (38.5%)         | 16 (61.5%)  | 0         |
| Other NTM                | 42 (46.2%)                       | 47 (51.6%)  | 2 (2.2%)  | 25 (44.6%)         | 31 (55.4%)  | 0         |
| Total                    | 615 (50.3%)                      | 589 (48.2%) | 18 (1.5%) | 892 (55.7%)        | 696 (43.4%) | 14 (0.9%) |

\*Counts within each disease definition represent unique patients; some patients fulfilled criteria for >1 species.

†Exclusively standard microbiological criteria: 2 sputum cultures with the same species, or 1 bronchoscopic or lung biopsy culture

‡Strict microbiological criteria:  $\geq 3$  sputum cultures with the same species, or  $\geq 2$  bronchoscopic cultures with the same species, or 1 bronchoscopic plus 1 sputum culture with the same species, or 1 lung biopsy culture.
